# Supplementary material for: Fusobacterium nucleatum Accelerates the Progression of Colitis-Associated Colorectal Cancer by Promoting EMT
Source: PubMed Central journal article supplement (PMC7598280; doi:10.3390/cancers12102728), 2020-09-23

# Supplementary Materials: *Fusobacterium nucleatum* accelerates progression of colitis-associated colorectal cancer by promoting EMT

Mi Ra Yu, Hye Jung Kim and Hae Ryoum Park

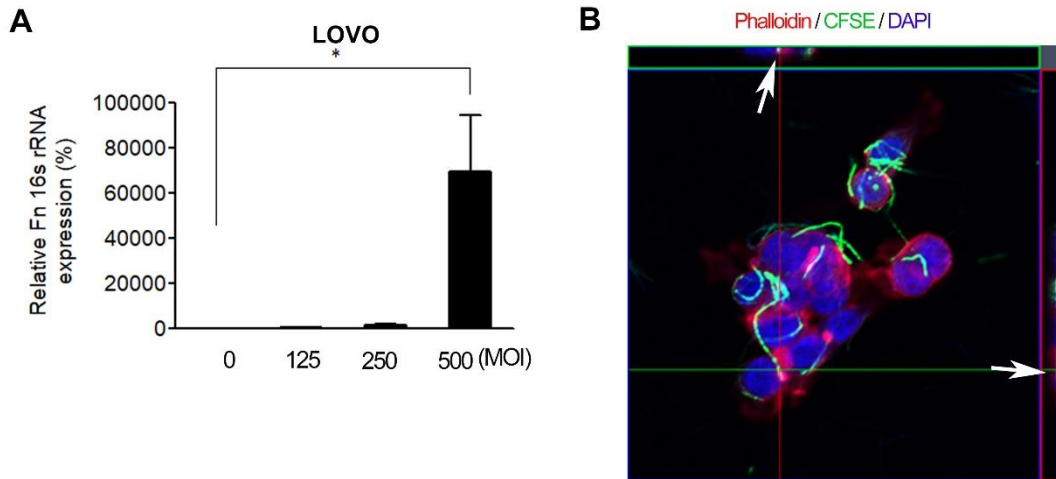

**Figure 1.** The expression of *F. nucleatum* 16S rRNA in representative CRC cell was detected by RT-qPCR. (A) Data are means ± SEM. \*  $p < 0.05$  vs. corresponding control. (B) Orthogonal view from different planes (x/y, x/z or y/z) of the confocal microscope images used to confirm internalization of *F. nucleatum* within CRC cells. Filled arrows indicate internalized in cytoplasm.

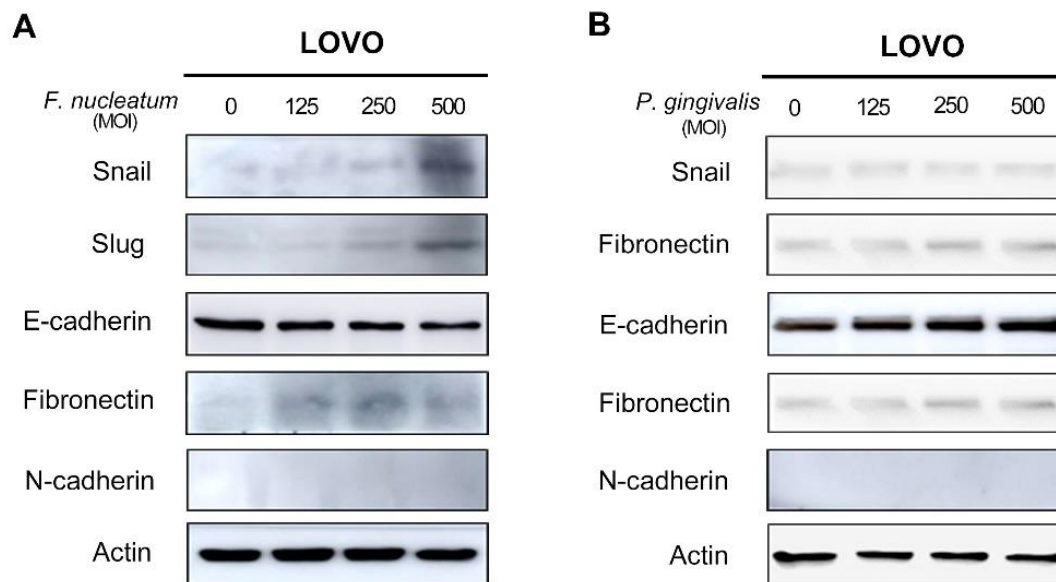

**Figure 2.** Effect of *F. nucleatum* and *P. gingivalis* in representative CRC cell. Expression of EMT markers in (A) *F. nucleatum* and (B) *P. gingivalis* infected CRC cell was detected by western blot analysis. Uncropped Western Blots can be observed in Figure S10.

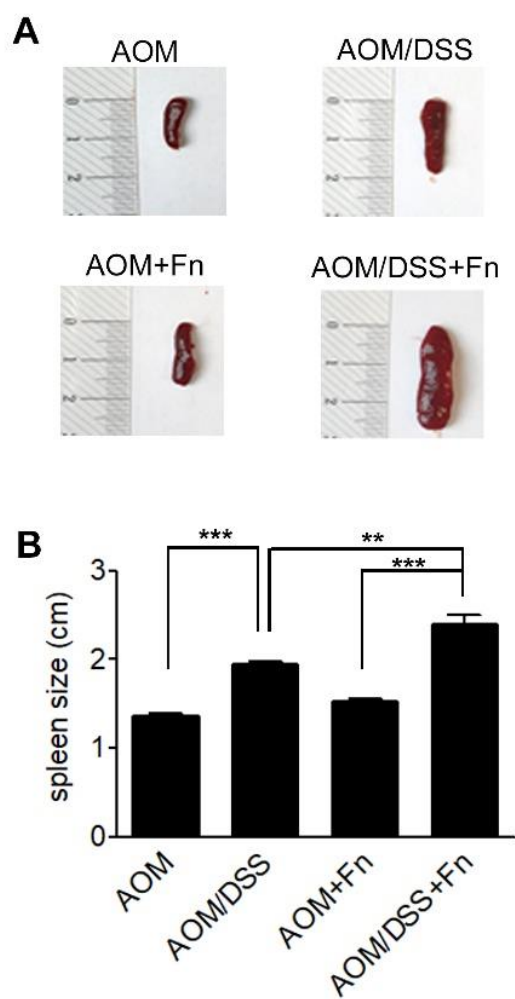

**Figure 3.** Observation of spleen enlargement in each mice groups. (A) Gross images of spleen. (B) graphical quantitation. Data are presented as the means  $\pm$  SEM (\*\* $p < 0.01$ , and \*\*\* $p < 0.005$ ; unpaired Student's  $t$ -test).

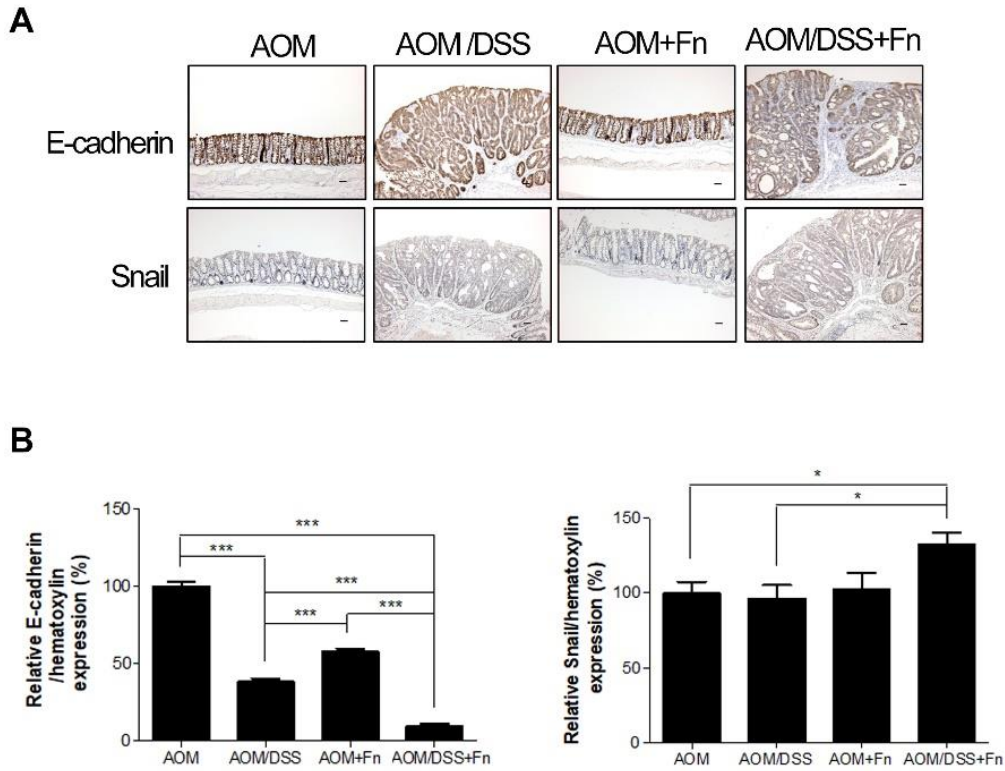

**Figure 4.** Representative immunohistochemical staining images for Snail and E-cadherin in colon tissue. (A) Microscopy image at the original magnification of 200 times is shown. (B) The graph represents relative protein expression levels obtained from immunohistochemical staining images for E-cadherin and Snail compared with the AOM group. The data are presented as the mean ± SEM (\* $p < 0.05$  and \*\*\* $p < 0.001$ ; unpaired Student’s  $t$ -test). Abbreviations: AOM, azoxymethane; DSS, dextran sodium sulfate; Fn, *F. nucleatum*.

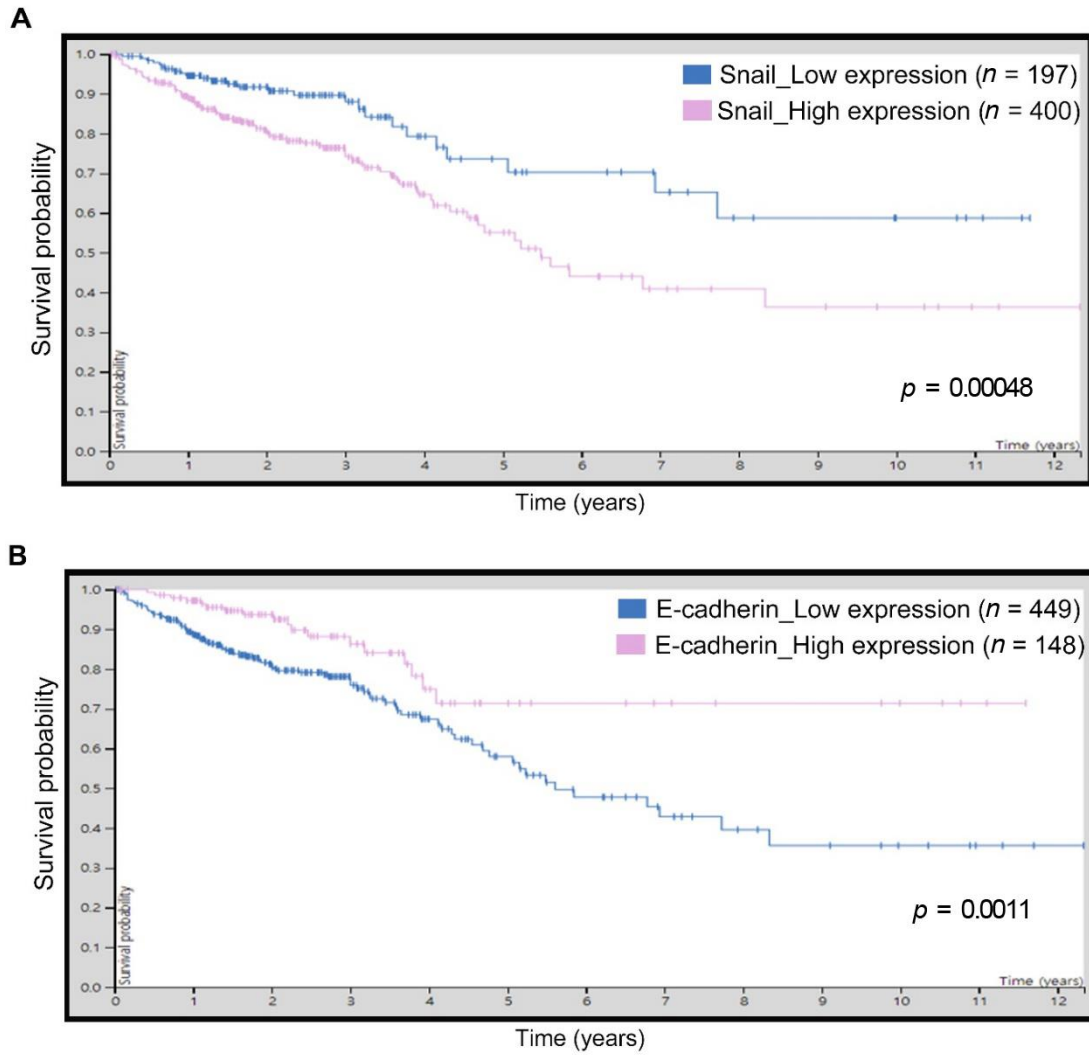

**Figure 5.** Prognostic importance of epithelial to mesenchymal transition markers in CRC patients. **(A)** Survival probability curves stratified by Snail expression. **(B)** Survival probability curves stratified by E-cadherin.

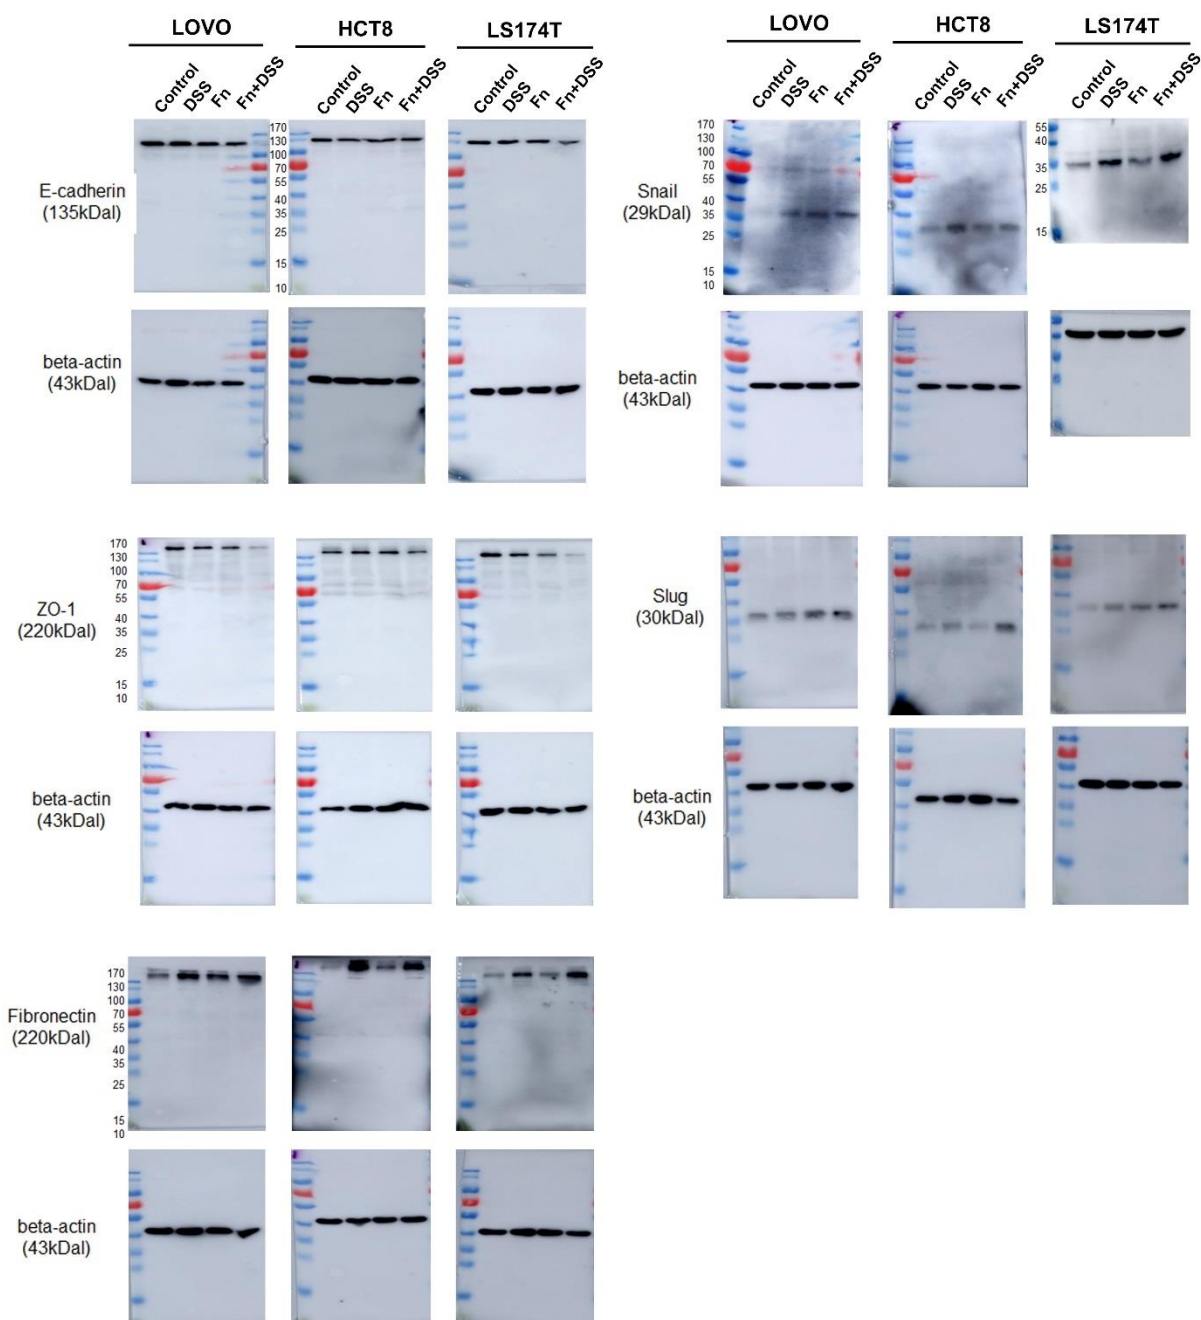

Figure 6. Uncropped Western Blots of Figure 2B.

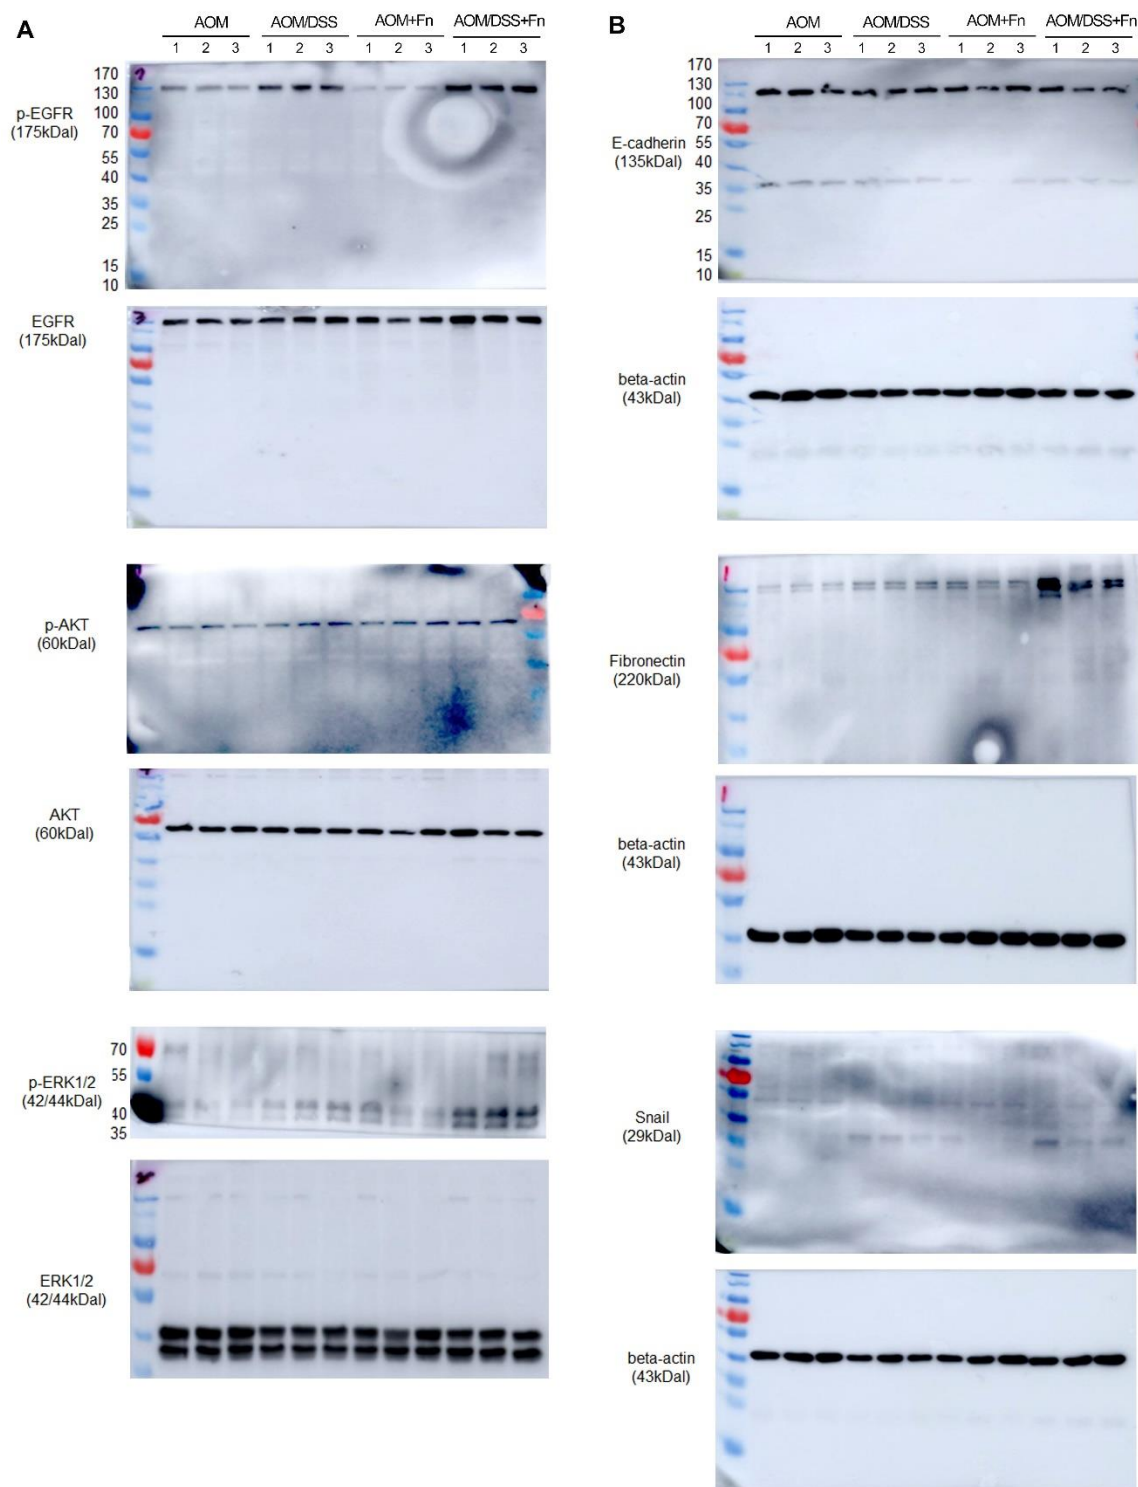

Figure 7. Uncropped Western Blots of Figure 6A.



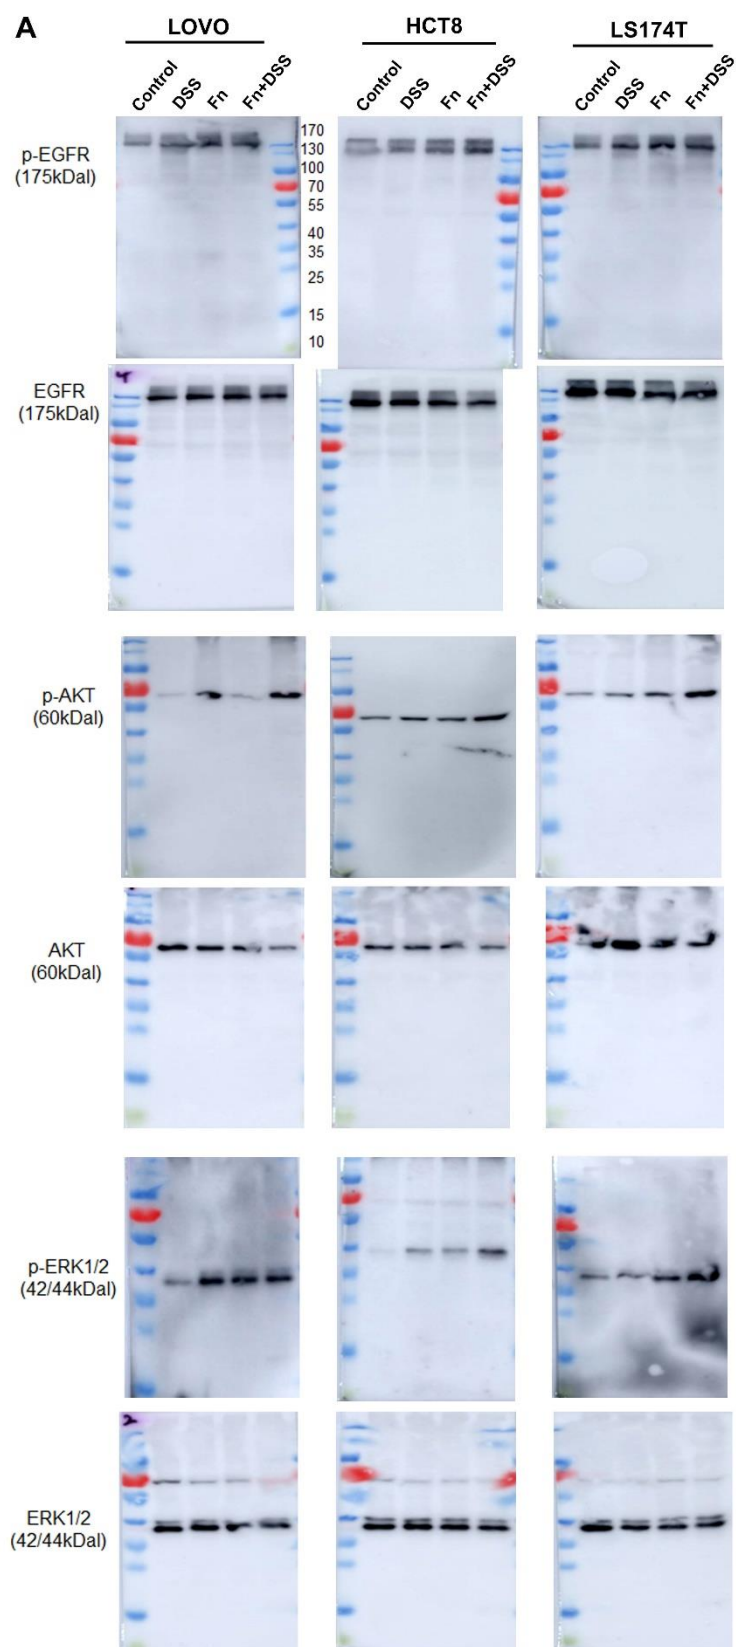

**Figure 8.** Uncropped Western Blots of Figure 7A.

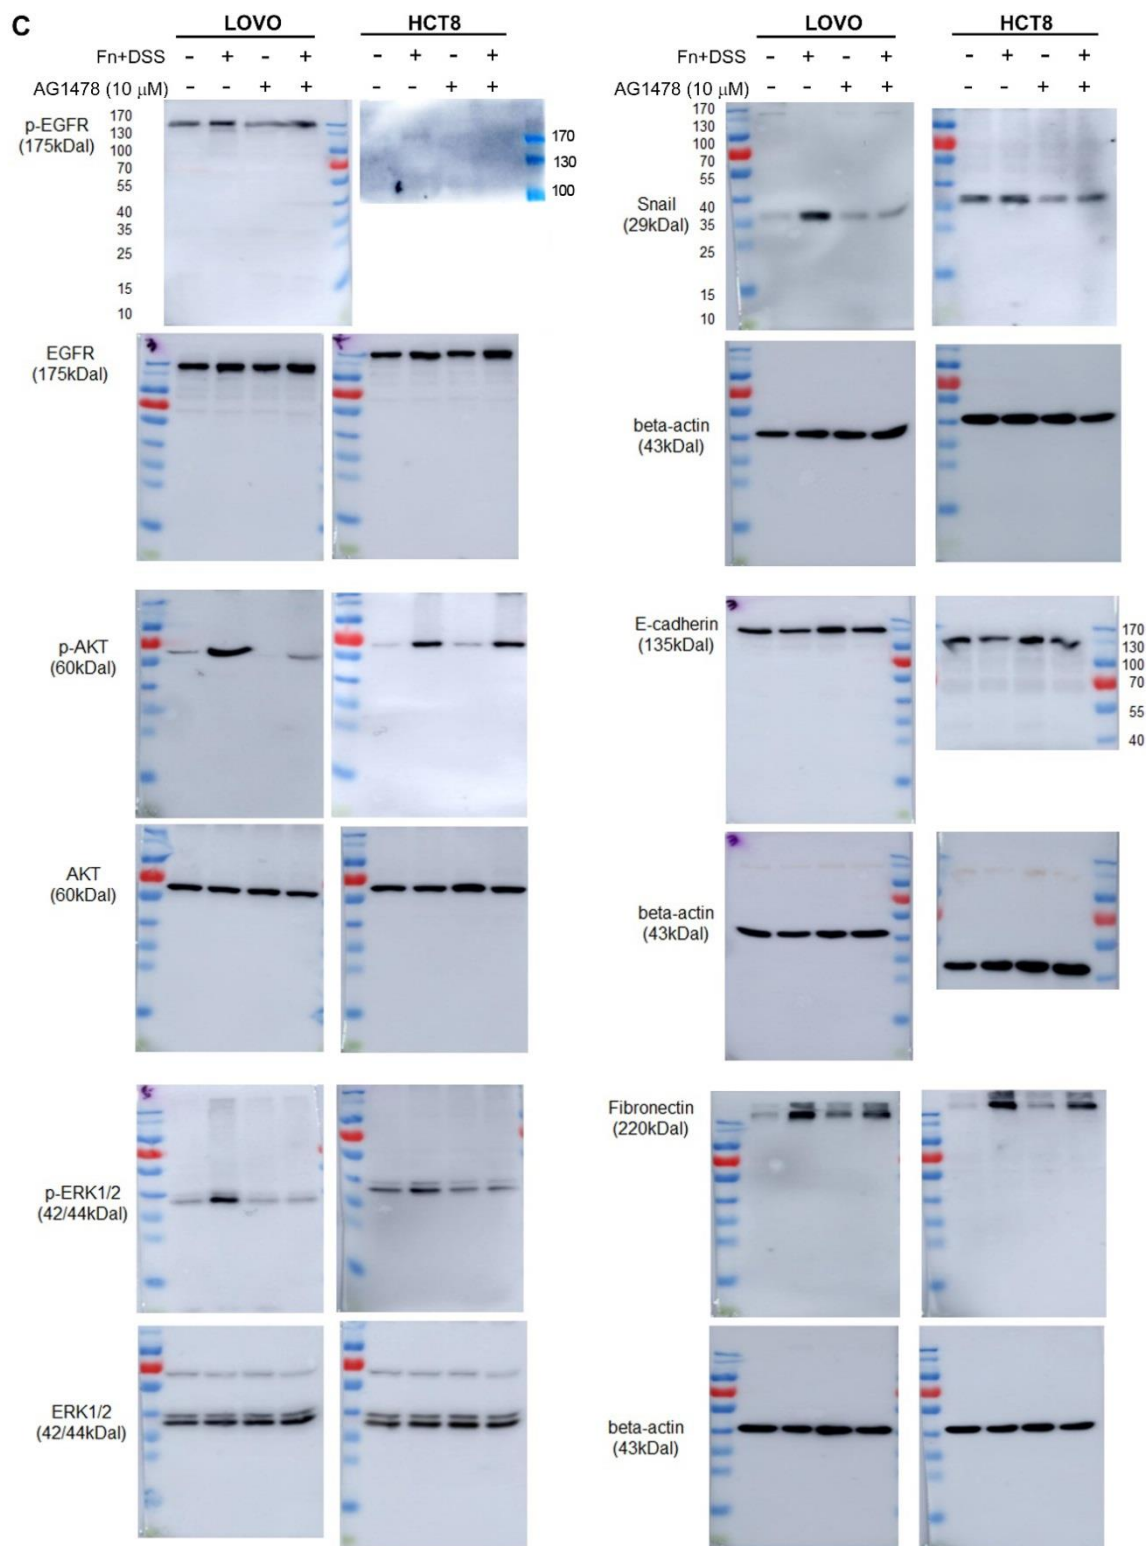

Figure 9. Uncropped Western Blots of Figure 7C.



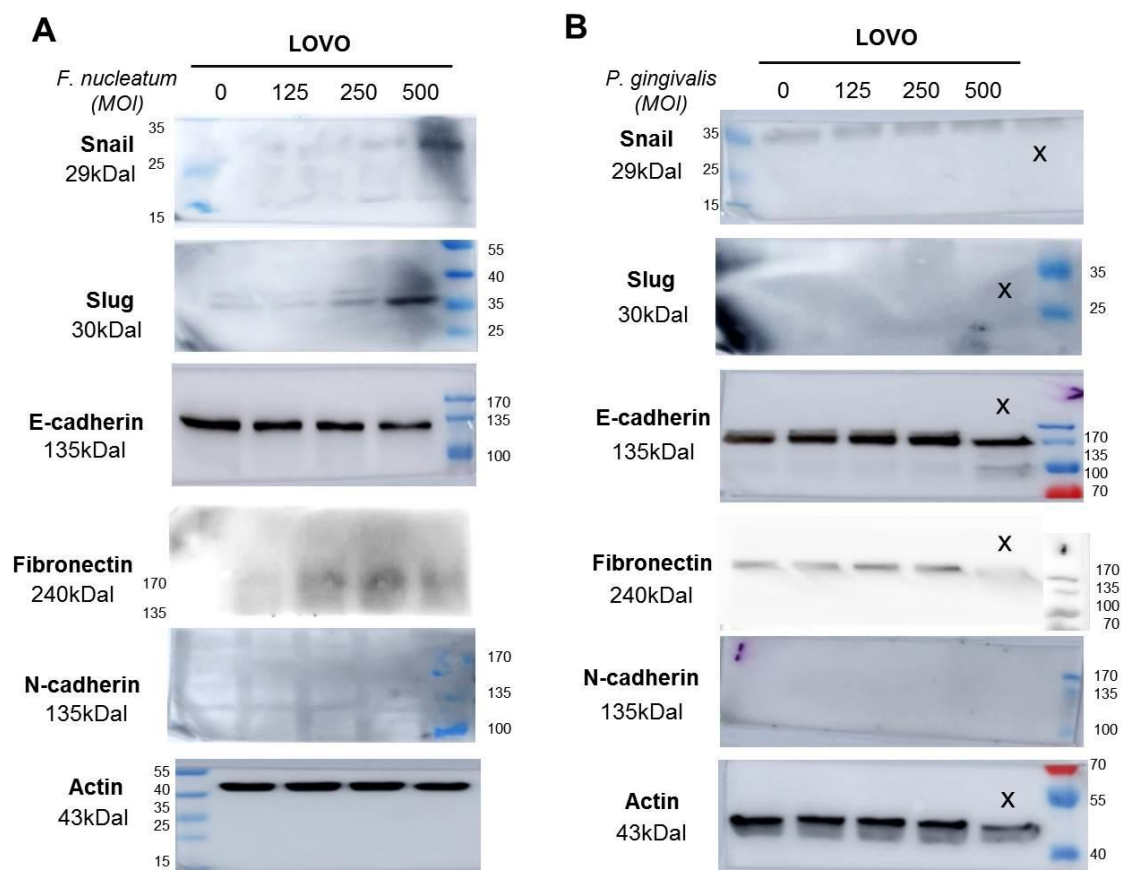

**Figure 10.** Uncropped Western Blots of Supplementary Material Figure 2. In (B), X indicates that it was excluded from the results because cytotoxicity was exhibited by treatment with a high concentration of *P. gingivalis*.

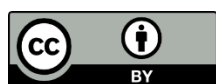

Supplement: cancers-12-02728-s001.pdf [file cancers-12-02728-s001.pdf]
